# Supplementary material for: Oxygen adsorption on single layer graphyne: a DFT study
Source: Royal Society of Chemistry journal article supplement (doi:10.1039/c3cp53237b), 2013-10-29
Supplement: c3cp53237b.pdf [file c3cp53237b.pdf]

**Electronic Supplementary Information**

# Oxygen Adsorption on Single Layer Graphyne: A DFT Study

Baotao Kang, Hongguang Liu, Jin Yong Lee\*

Department of Chemistry, Sungkyunkwan University, Suwon, 440-746, Korea

e-mail address: [jinylee@skku.edu](mailto:jinylee@skku.edu)

**Table S1.** The optimized lattice constant (a) and carbon-carbon bond lengths of each graphyne model obtained by LDA (PWC) method.

**Figure S1.** Oxygen binding sites for the  $\alpha$ -,  $\beta$ - and  $\gamma$ -graphyne (S and T in parentheses stand for singlet and triplet state).

**Table S1.** The optimized lattice constant ( $a$ ) and carbon-carbon bond lengths of each graphyne model obtained by LDA (PWC) method.

|                    | $a(\text{Å})$ | $R_{C1-C1}(\text{Å})$ | $R_{C1-C2}(\text{Å})$ | $R_{C2-C2}(\text{Å})$ | Band Gap (eV) |
|--------------------|---------------|-----------------------|-----------------------|-----------------------|---------------|
| $\alpha$ -graphyne | 6.920         | 1.226                 | 1.384                 |                       | 0             |
| $\beta$ -graphyne  | 9.408         | 1.229                 | 1.377                 | 1.445                 | 0             |
| $\gamma$ -graphyne | 6.830         | 1.219                 | 1.394                 | 1.412                 | 0.408         |

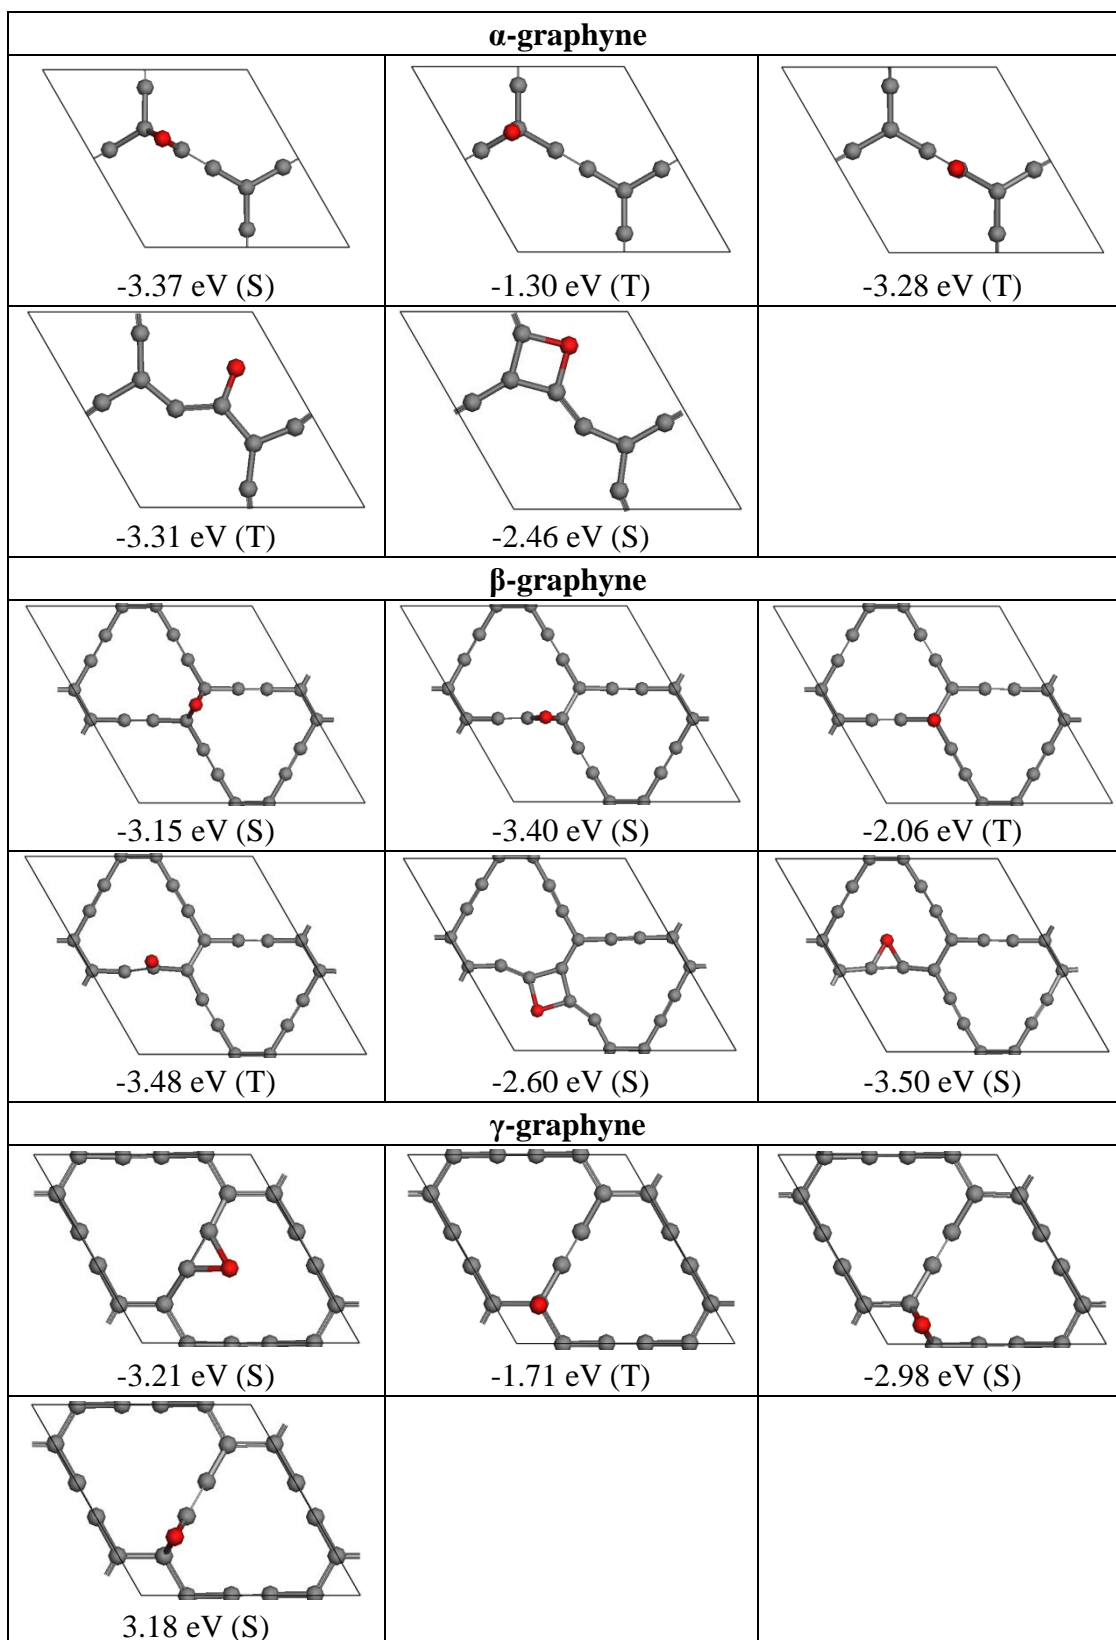

**Figure S1.** Oxygen binding sites for the  $\alpha$ -,  $\beta$ - and  $\gamma$ -graphyne (S and T in parentheses stand for singlet and triplet state).
